# Supplementary material
Source: bioRxiv or medRxiv preprint supplement (https://www.medrxiv.org/highwire/filestream/73205/field_highwire_adjunct_files/0/2020.03.04.20031211-1.pdf)

# Appendix

## Appendix A. Illness Questionnaire

1. How long ago did you first notice your current illness?
  - a. MM-DD-YYYY
  
2. Around when did your symptoms start?
  - a. Half a day ago
  - b. Half a day - 1 day ago
  - c. 1 - 1.5 days ago
  - d. 1.5 - 2 days ago
  - e. 3 days ago
  - f. 4 days ago
  - g. 5 or more days ago
  
3. How long did it take you to go from feeling not sick at all to feeling the sickest you have felt?
  - a. Half a day ago
  - b. Half a day - 1 day ago
  - c. 1 - 1.5 days ago
  - d. 1.5 - 2 days ago
  - e. 3 days ago
  - f. 4 days ago
  - g. 5 or more days ago
  
4. Which new or worsening symptoms have you experienced in the last 7 days? Select all that apply.
  - a. Feeling feverish Headache
  - b. Cough
  - c. Chills or shivering Sweats
  - d. Sore throat or itchy/scratchy throat
  - e. Nausea or vomiting
  - f. Runny or stuffy nose
  - g. Feeling more tired than usual
  - h. Muscle or body aches
  - i. Increased trouble with breathing
  - j. Diarrhea
  - k. Rash
  - l. Ear pain or ear discharge
  - m. None of the above
  
5. How severe are your symptoms? (Select the level of discomfort you have felt at the worst point so far for each of the symptoms selected above)
  - a. Mild
  - b. Moderate
  - c. Severe

6. What is your sex?
  - a. Male
  - b. Female
  - c. Other (please specify)
  - d. Prefer not to say
  
7. Are you Hispanic or Latino?
  - a. Yes
  - b. No
  - c. Prefer not to say
  
8. How would you describe your race? (Select all that apply)
  - a. American Indian or Alaska Native
  - b. Asian
  - c. Native Hawaiian or other Pacific Islander
  - d. Black or African American
  - e. White
  - f. Other
  - g. Prefer not to say
  
9. What is the highest level of education you have completed?
  - a. Less than high school graduate
  - b. Graduated high school / obtained GED
  - c. Some college (including vocational training, associate's degree)
  - d. Bachelor's degree
  - e. Advanced degree
  - f. Prefer not to say
  
10. Please choose the range that best represents your household income last year (before taxes). If you are still considered a "dependent" for tax purposes, choose the range that describes your parent/legal guardian's household income.
  - a. Less than or equal to \$25,000
  - b. Between \$25 and 50 thousand (\$25,001 to \$50,000)
  - c. Between \$50 and 75 thousand (\$50,001 to \$75,000)
  - d. Between \$75 and 100 thousand (\$75,001 to \$100,000)
  - e. Between \$100 and 125 thousand (\$100,001 to \$125,000)
  - f. Between \$125 and 150 thousand (\$125,001 to \$150,000)
  - g. Over \$150,000
  - h. Don't know
  - i. Prefer not to say
  
11. What type of health insurance do you have? (Select all that apply)
  - a. Private (provided by employer and/or purchased)
  - b. Government (Medicare/Medicaid)
  - c. Other
  - d. None

- e. Prefer not to say
12. Are you currently pregnant?
- a. Yes
  - b. No
  - c. Prefer not to say
13. Are you affiliated with the University of Washington?
- a. Yes, I am an undergraduate student
  - b. Yes, I am a graduate/professional student
  - c. Yes, I am a faculty member
  - d. Yes, I am a staff member/university employee
  - e. No
14. What kind of residence do you live in?
- a. On-campus residence hall
  - b. On-campus apartment
  - c. Greek life housing
  - d. Off-campus house
  - e. Off-campus apartment
  - f. Other
15. Where do you live?
- a. House/condo/townhouse
  - b. Shelter
  - c. Apartment
  - d. Dormitory
  - e. Assisted living facility
  - f. Skilled nursing center
  - g. No consistent primary residence
  - h. Other
16. What is your usual nighttime accommodation?
- a. Shelter
  - b. Transitional housing/safe haven
  - c. Street/outside/tent/encampment
  - d. Abandoned building/squat
  - e. Vehicle (car, van, RV, camper)
  - f. Hotel or motel
  - g. Prefer not to say
  - h. None of the above
17. Which shelter has served as your primary residence over the last 7 days?
- a. Aloha Inn
  - b. Blaine Center Homeless Ministry
  - c. Bread of Life Mission
  - d. Compass Housing Alliance
  - e. DESC (Downtown Emergency Service Center)

- f. Elizabeth Gregory House
- g. Hammond House Women's Shelter
- h. Jubilee Women's Center
- i. King County Men's Winter Shelter
- j. Mary's Place
- k. Noel House Women's Referral Center
- l. Pike Market Senior Center
- m. Roots Young Adult Shelter
- n. Sacred Heart Shelter
- o. Saint Martin de Porres Shelter
- p. Salvation Army Women's Shelter
- q. Seattle City Hall Shelter
- r. Seattle Union Gospel Mission for Men
- s. YMCA Emergency Shelter
- t. Other/none of the above

18. Including yourself, how many people share your kitchen or living space?

- a. I live by myself
- b. 2 people
- c. 3 people
- d. 4 people
- e. 5 people
- f. 6 or more people

19. What age groups of children are in your house?

- a. No children
- b. Age 0-5 years
- c. Age 6-12 years
- d. Age 13-18 years

20. Do these children attend daycare or a child care center?

- a. Yes
- b. No

21. Approximately how many hours per week do these children attend daycare or childcare?

\_\_\_\_\_

22. In the past 7 days, has someone you live with been diagnosed with the flu by a medical professional?

- a. Yes
- b. No
- c. Do not know

23. Have you sought clinical care for your current illness since it started?

- a. No
- b. Yes; Doctor's office or Urgent Care
- c. Yes; Pharmacy (drugstore)
- d. Yes; Hospital or Emergency Department

- e. Yes; Other

24. Are you receiving an antiviral prescribed by a medical professional for the treatment or prevention of flu?

- a. No
- b. Yes; Oseltamivir (Tamiflu)
- c. Yes; Zanamivir (Relenza)
- d. Yes; Peramivir (Rapivab)
- e. Yes; Baloxavir (Xofluza)
- f. Yes, but I don't know which medication
- g. Do not know

25. Are you receiving an antibiotic prescribed by a medical professional for your illness?

- a. No
- b. Yes; Zithromycin (Z-pack or Zithromax)
- c. Yes; Amoxicillin (Moxatag)
- d. Yes; Amoxicillin/Clavulanate (Augmentin)
- e. Yes; Levofloxacin (Levaquin)
- f. Yes; Moxifloxacin (Avelox)
- g. Yes, but I don't remember which antibiotic
- h. Yes, but my antibiotic is not listed
- i. Do not know

26. At my place of work, employees are encouraged to take time off or work from home if they are sick.

- a. Yes, and I would be paid for hours missed
- b. Yes, but I would not be paid for hours
- c. No
- d. I am not currently employed

27. How has your current illness affected your ability to do your regular activities (work, school, etc.)?

- a. Not at all
- b. A little bit
- c. Somewhat
- d. Quite a bit
- e. Very much

28. Other than work and/or school, which of the following daily activities have been impacted by your current illness? (Select all that apply)

- a. Running errands
- b. Exercising
- c. Socializing
- d. Volunteering
- e. Ability to take care of myself and /or family
- f. None of the above / my activities have not been impacted

29. Has your current illness kept you from doing any of the following? (Select all that apply)

- a. Attending class
  - b. Going to work
  - c. Studying
  - d. Performing well on an exam or written assignment
  - e. None of the above / my activities have not been impacted
30. Do you use any of the following products (either indoors or outdoors)? (Select all that apply)
- a. Tobacco products (e.g. cigarettes, cigars, pipes)
  - b. Electronic cigarettes/vapor pens
  - c. None of the above
  - d. Prefer not to say
31. Does anyone in your shared living space use any of the following products (either indoors or outdoors)? (Select all that apply)
- a. Tobacco products (e.g. cigarettes, cigars, pipes)
  - b. Electronic cigarettes/vapor pens
  - c. None of the above
  - d. Do not know
32. Have you received this season's influenza (flu) vaccine (since July 1, 2019) ? This includes both flu mist nasal spray and the flu shot.
- a. Yes
  - b. No
  - c. Do not know
33. What year did you get the flu shot or flu mist nasal spray this season (since July 1, 2019)?
- a. 2019
  - b. 2020
  - c. Do not know
34. What month did you get the flu shot or flu mist nasal spray this season (since July 1, 2019)?
- \_\_\_\_\_
35. How did you receive the flu vaccine this season (since July 1, 2019)?
- a. Injection (flu shot)
  - b. Nasal spray (flu mist)
36. Where did you receive the flu vaccine this season (since July 1, 2019)?
- a. Medical clinic or hospital
  - b. Pharmacy or drugstore
  - c. Workplace
  - d. School
  - e. Other
37. What is the primary reason why you have not received the flu vaccine this season (since July 1, 2019)?
- a. Do not have time to get vaccinated
  - b. Not required for work or school

- c. Not recommended by a doctor or healthcare worker
- d. Not covered by health insurance
- e. Not offered at a convenient location
- f. I am not worried about getting sick with the flu
- g. Concerns about vaccine safety or effectiveness
- h. I plan to get the flu vaccine
- i. None of the above

38. Did you receive the flu vaccine last season? (July 1, 2018 - July 1, 2019)

- a. Yes
- b. No

39. Have you ever been told by a healthcare provider that you have one of the following medical conditions? (Select all that apply)

- a. Asthma or reactive airway disease
- b. COPD/emphysema
- c. Chronic bronchitis
- d. Cancer
- e. Diabetes
- f. Heart disease (heart failure or heart attack)
- g. None of the above
- h. Do not know
- i. Prefer not to say

40. In the past 7 days, have you visited a country other than the US? \_\_\_\_\_

41. In the past 7 days have you traveled outside the state of Washington? \_\_\_\_\_

## Appendix B. 1 Week Follow-Up Survey

The following questions refer to your illness from [enrollment\_date]

1. Are you fully recovered from your illness?
  - a. Yes
  - b. No
  - c. Do Not Know
  
2. How many days did your illness last? \_\_\_\_\_
  
3. Have you visited a country other than the US since [enrollment\_date]?
  - a. Yes
  - b. No - I have not traveled to the US
  
4. Countries visited: \_\_\_\_\_
  
5. Have visited a state other than Washington since [enrollment\_date]?
  - a. Yes
  - b. No - I have not traveled to a state outside Washington
  
6. States visited: \_\_\_\_\_
  
7. What was the purpose of your recent travel? Check all that apply.
  - a. Tourism
  - b. Business
  - c. Visiting family and/or friends
  - d. I just moved here from another US state
  - e. I just moved here from another country
  - f. Other
  
8. When your recent illness was its worst, how did it affect your ability to do your regular activities (work, school, etc.)?
  - a. Not at all
  - b. A little bit
  - c. Somewhat
  - d. Quite a bit
  - e. Very much
  
9. Were any of the following activities impacted because you were feeling sick? Select all that apply.



- a. School
  - b. Work
  - c. Running errands
  - d. Exercising
  - e. Socializing
  - f. Volunteering
  - g. Ability to take care of myself and/or my family
  - h. None of the Above/ My activities have not been impacted
10. Did your illness keep you from doing any of the following? Select all that apply.
- a. Attending class
  - b. Going to work
  - c. Studying
  - d. Performing well on an exam or written assignment
  - e. None of the Above/ My activities have not been impacted
11. How many days were you not able to go to school? \_\_\_\_\_
12. Did any of the following occur because you were feeling sick? Select all that apply.
- a. I missed work
  - b. I worked from home
  - c. I worked fewer hours than usual
  - d. None of the above
13. How many days were you not able to go to work? \_\_\_\_\_
14. Did you seek clinical care (from a healthcare provider) for your illness since your symptoms were reported on [enrollment\_date]?
- a. Yes - Doctor's office or Urgent Care
  - b. Yes - Pharmacy (drugstore)
  - c. Yes - Hospital or Emergency Department
  - d. Yes - Other
  - e. No
15. Did you receive antiviral medication for your illness?
- a. No
  - b. Yes; Oseltamivir (Tamiflu)
  - c. Yes; Zanamivir (Relenza)
  - d. Yes; Peramivir (Rapivab)
  - e. Yes; Baloxavir (Xofluza)
  - f. Yes; but I don't know which medication
  - g. Do not know

16. Did you receive antibiotics for your illness?
- a. No
  - b. Yes; Zithromycin (Z-pack or Zithromax)
  - c. Yes; Amoxicillin (Moxatag)
  - d. Yes; Amoxicillin/Clavulanate (Augmentin)
  - e. Yes; Levofloxacin (Levaquin)
  - f. Yes; Moxifloxacin (Avelox)
  - g. Yes, but I don't remember which antibiotic
  - h. Yes, but my antibiotic is not listed
  - i. Do not know
17. Did you do any of the following in the past week because you were feeling sick? Select all that apply.
- a. More frequently washed hands with soap and water or used hand sanitizer more frequently than usual
  - b. More frequently covered my mouth and nose with a tissue when coughing or sneezing
  - c. More frequently coughed or sneezed into my elbow or shoulder
  - d. More frequently cleaned or disinfected my living space or workspace
  - e. Avoided public transport or took it less often than I normally would
  - f. Stayed home
  - g. Wore a face mask in public to help protect others from getting sick
  - h. Encouraged others to get the flu vaccine
  - i. Avoided contact with others
  - j. I did not change any of my behaviors because I was feeling sick
18. Is there anything else about your Seattle Flu Study experience that you'd like to share with us?
-

## Appendix C. Quick Start Instruction Card

### STEP 3:

#### Ship your nasal swab

- 1 Write your name & the date on the collection tube.
- 2 Place your tube into the specimen bag & seal it tightly.
- 3 Place the specimen bag back into the box provided.
- 4 Place the box into the prepaid return bag.
- 5 Seal the bag by removing the adhesive strip.
- 6 Mail it back **ASAP** using:
  - a. Your own mailbox (if it fits).
  - b. A USPS Blue Box or Post Office.
  - c. A scheduled Package Pickup on usps.com.

### STEP 4:

#### Complete a follow-up survey online

Be on the lookout for a follow-up survey, delivered via email in about 7 days.

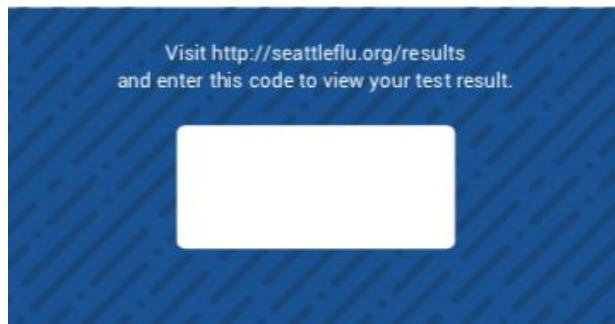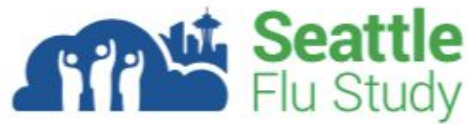

## Quick Start Guide

### Thank you for helping us learn more about the flu!

We're sorry you're not feeling well. Please follow the steps outlined in this guide for taking a swab and mailing it back to us. We hope you get well soon!

If you have any questions, you can contact the study team at any time at: [seattleflu@uw.edu](mailto:seattleflu@uw.edu) or 206-221-4588.

### STEP 1:

#### Fill out your survey

- 1 Search your inbox and spam folder for "Seattle Flu Study." **Click on the survey link.**
- 2 Fill out the survey on your web browser.

## STEP 2: Collect your nasal swab

- 1 Blow nose if needed, wash hands.
- 2 Remove the swab from packaging.

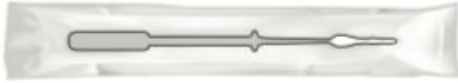

- 3 Loosen and remove the red cap from the tube. Careful! - the tube contains liquid.

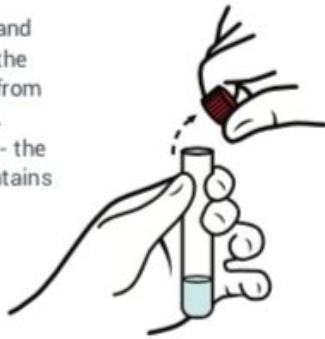

- 4 Insert swab about 1 inch into the nose.

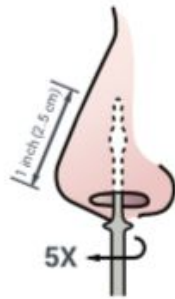

- 5 Press swab against side and rotate swab 5 times.

- 6 Place the swab into the solution in the provided tube.

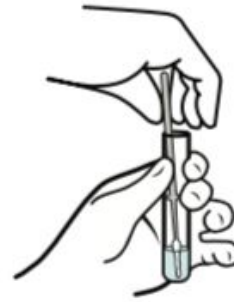

- 7 Break the swab handle at the score line (break line) by bending back and forth.

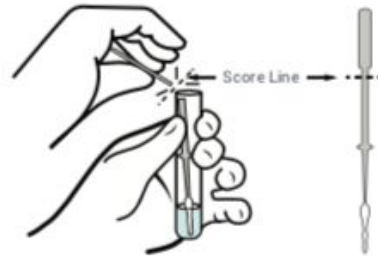

- 8 Screw red cap on tightly.

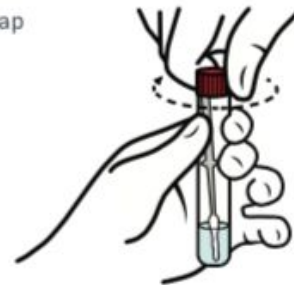

Supplement: Supplementary file [file 2020.03.04.20031211-1.pdf]
